# Supplementary material
Source: PubMed Central journal article supplement (PMC8492612)
Supplement: mmc1.pdf [file mmc1.pdf]

To whom it may concern,

With this letter, we confirm that Professor Kenneth Storey from Carleton University, has significantly contributed to the manuscript entitled "Metformin to decrease COVID-19 severity and mortality: molecular mechanisms and therapeutic potential". His contribution was related to the preparation of revised version of the manuscript - improvements suggested by reviewers, critical reading of the manuscript and language corrections. Thus, all of us agree his authorship to the manuscript by signing this letter.

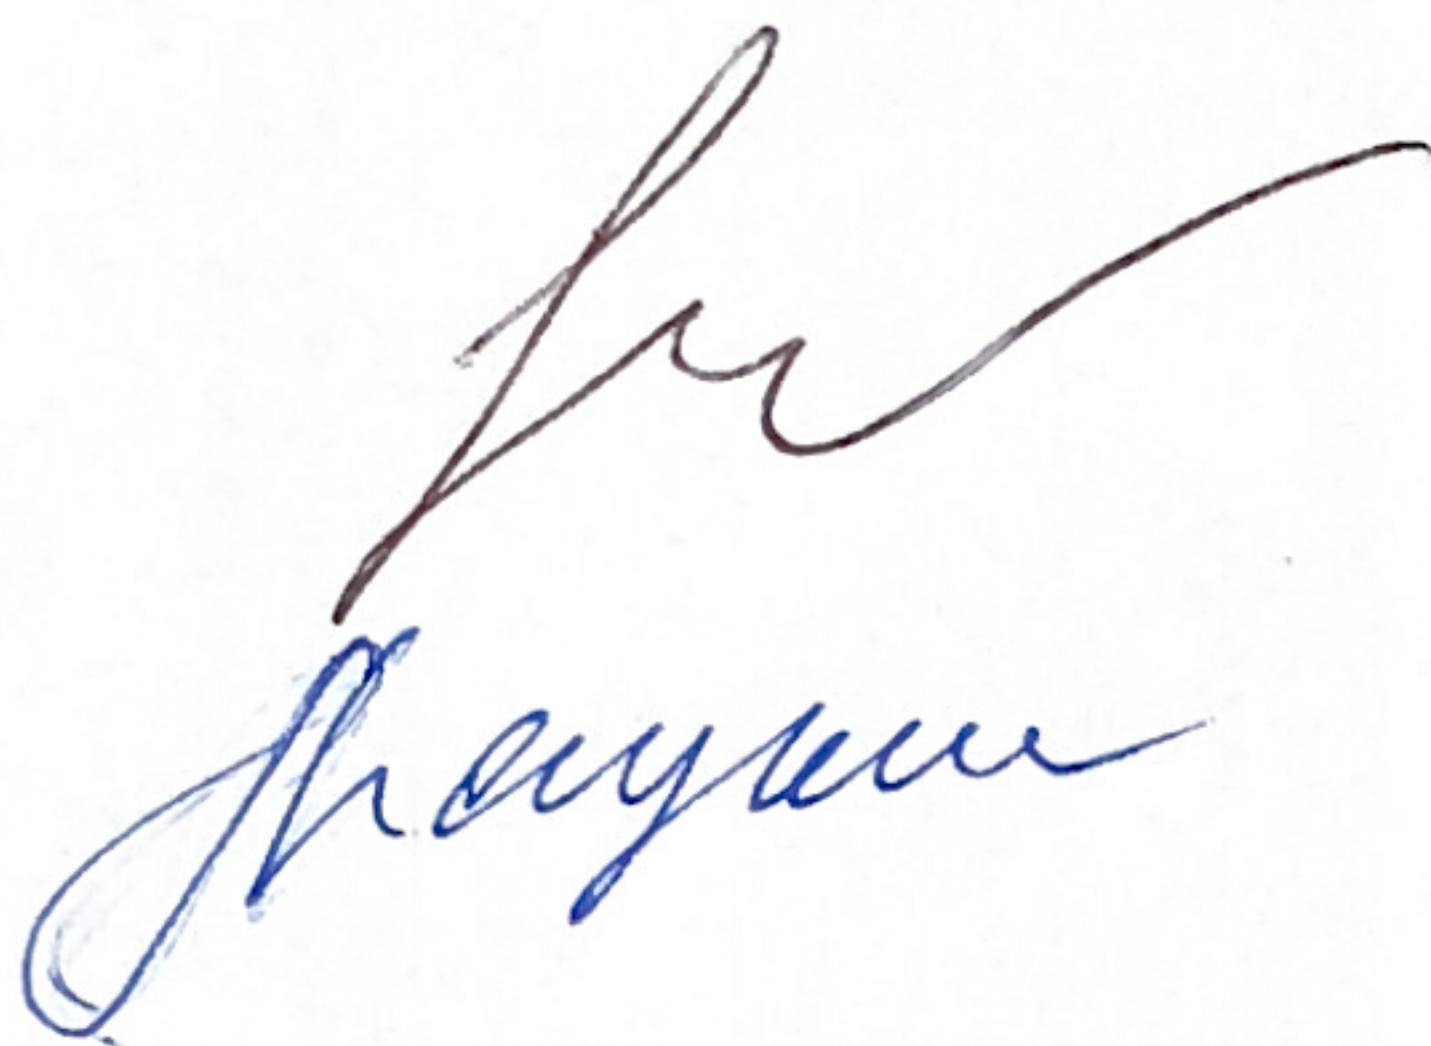

Olexandr Kamyshnyi



Victoriya Matskevych

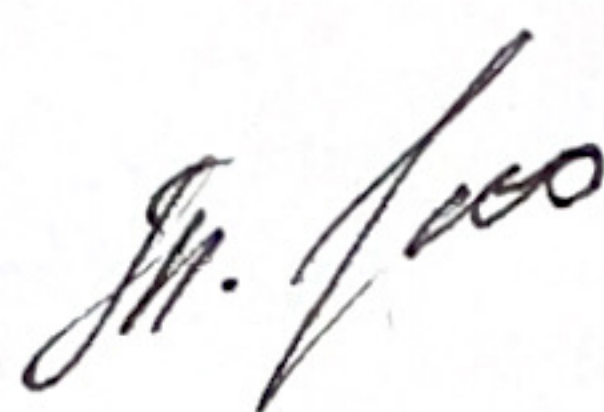

Tetyana Lenchuk

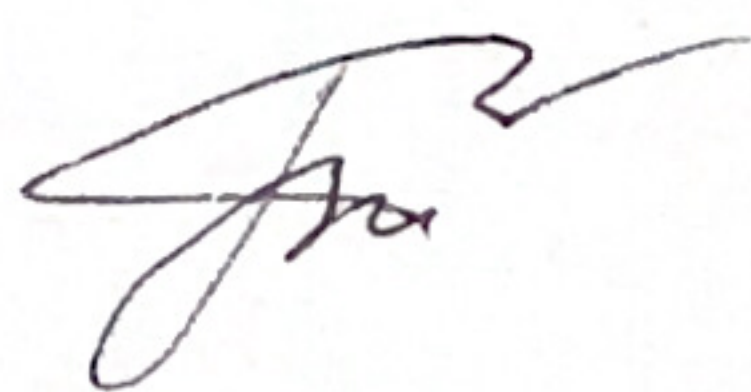

Olha Strilbytska



Oleh Lushchak
